# Supplementary material for: Studying specificity in protein–glycosaminoglycan recognition with umbrella sampling
Source: publisher site journal article supplement (doi:10.3762/bjoc.19.144), 2023-12-19
Supplement: Additional file 1 [file 1860-5397-19-144-S1.pdf]

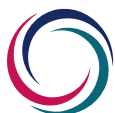

## Supporting Information

for

### Studying specificity in protein–glycosaminoglycan recognition with umbrella sampling

Mateusz Marcisz, Sebastian Anila, Margrethe Gaardløs, Martin Zacharias and Sergey A. Samsonov

*Beilstein J. Org. Chem.* **2023**, *19*, 1933–1946. [doi:10.3762/bjoc.19.144](https://doi.org/10.3762/bjoc.19.144)

### Additional information and graphical representations

1BFC

2AXM

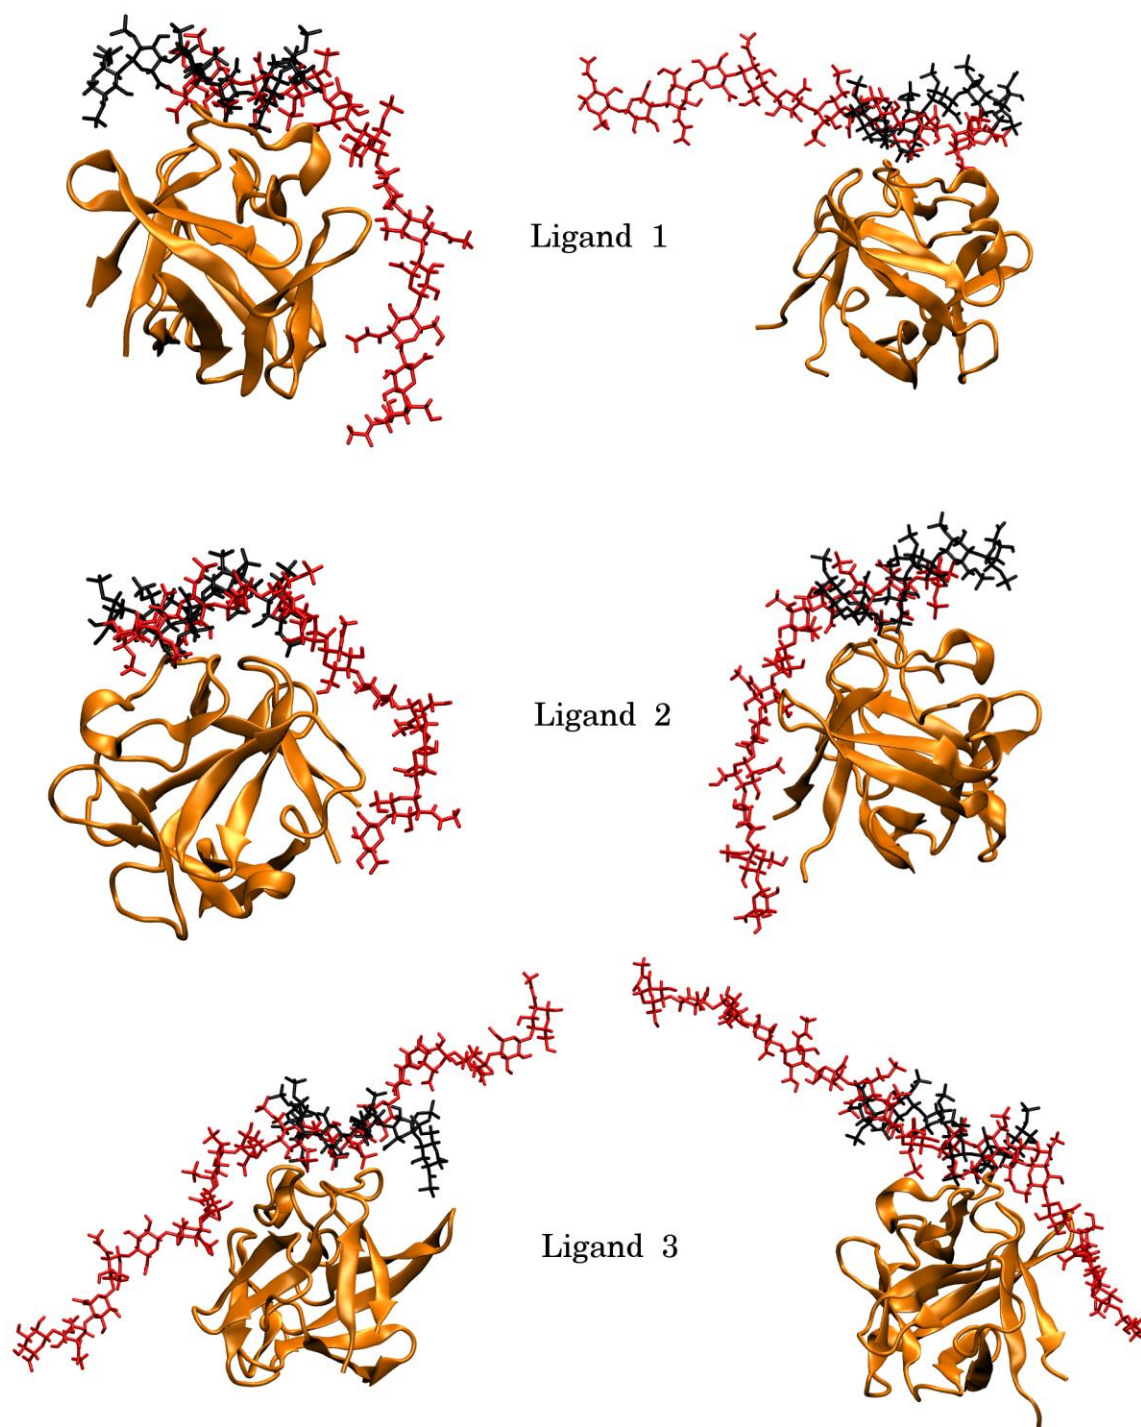

**Figure S1.** Graphical representation of ligands docked using RS-REMD method (licorice, in red) in comparison to the experimental structure (licorice, in black).

## 1BFC

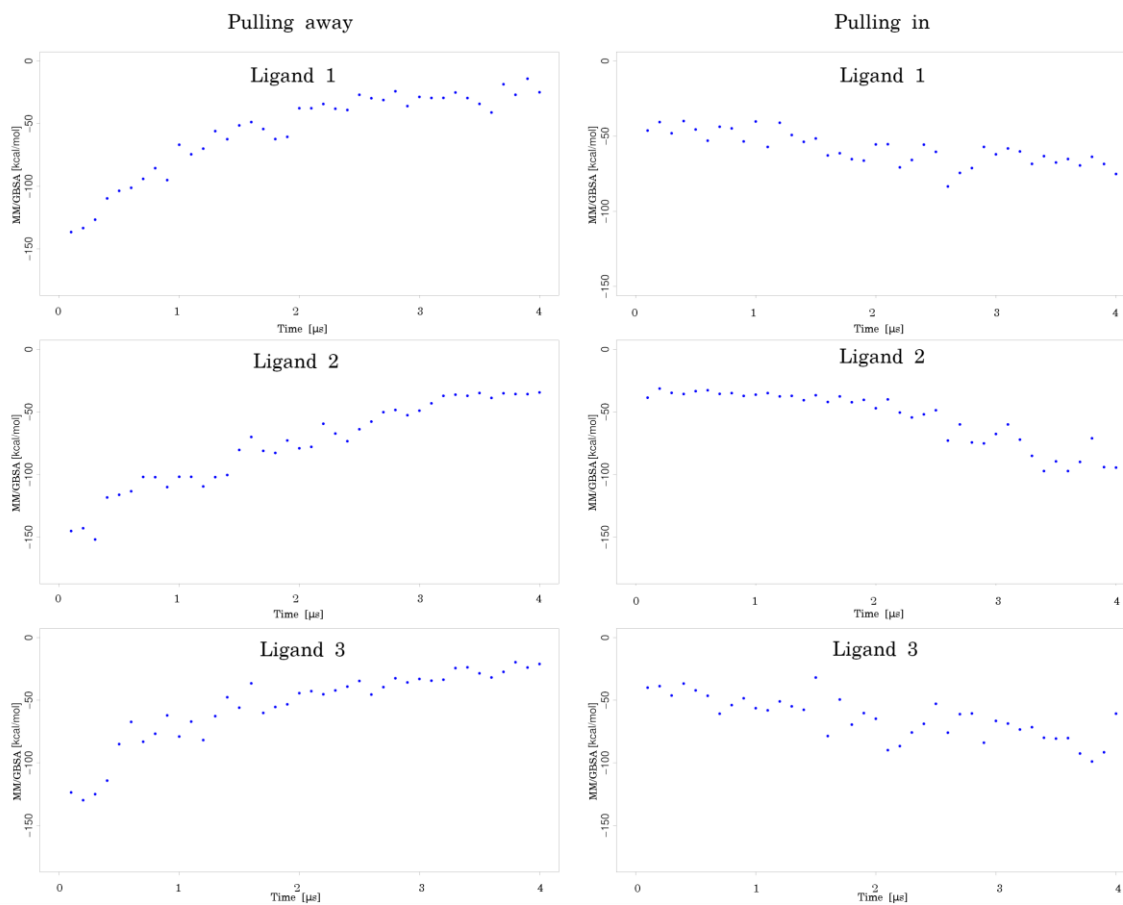

**Figure S2.** Energies obtained from MM/GBSA analysis for 1BFC complexes with 3 different ligands: ligand is pulled away from the binding site (left panel) and is pulled in towards the binding site (right panel).

## 1BFC

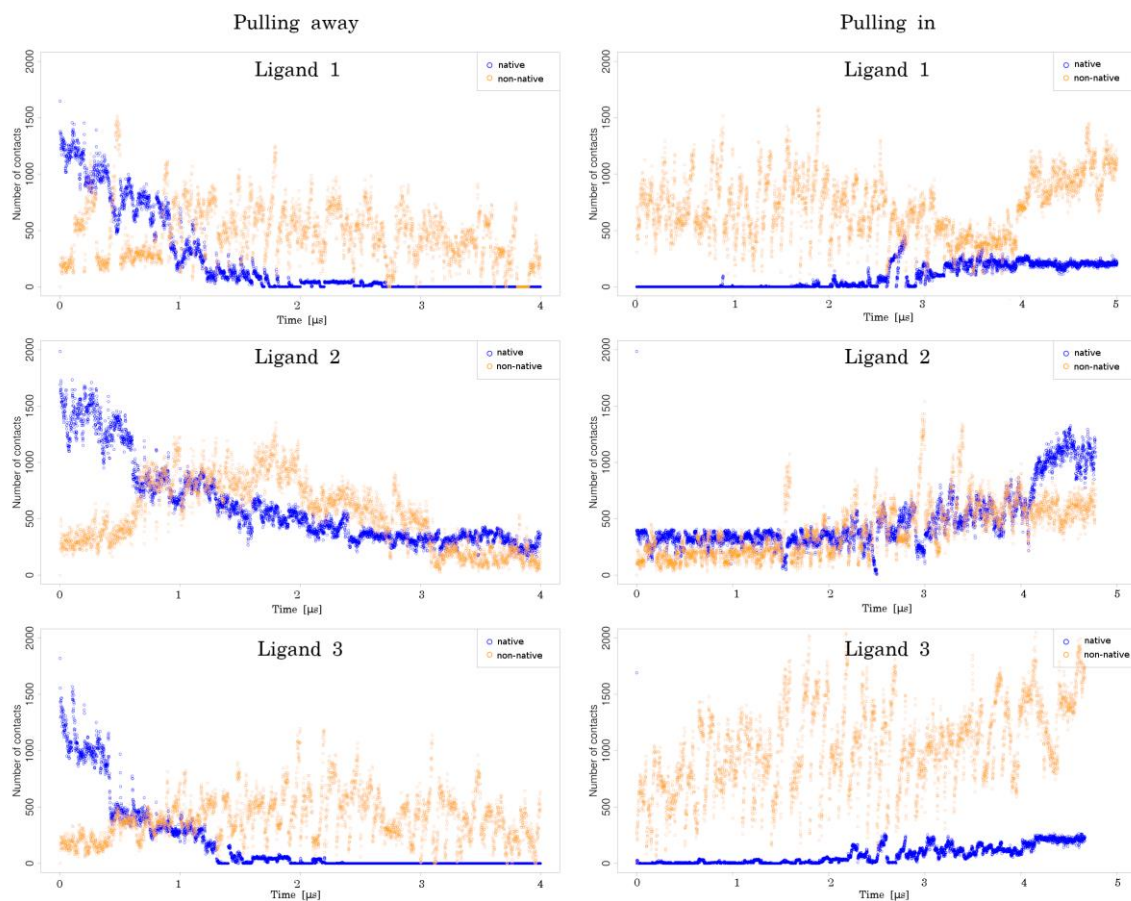

**Figure S3.** Number of native and non-native contacts obtained using cpptraj script from AMBER suite for 1BFC complexes with 3 different ligands: ligand is pulled away from the binding site (left panel) and is pulled in towards the binding site (right panel).

## 2AXM

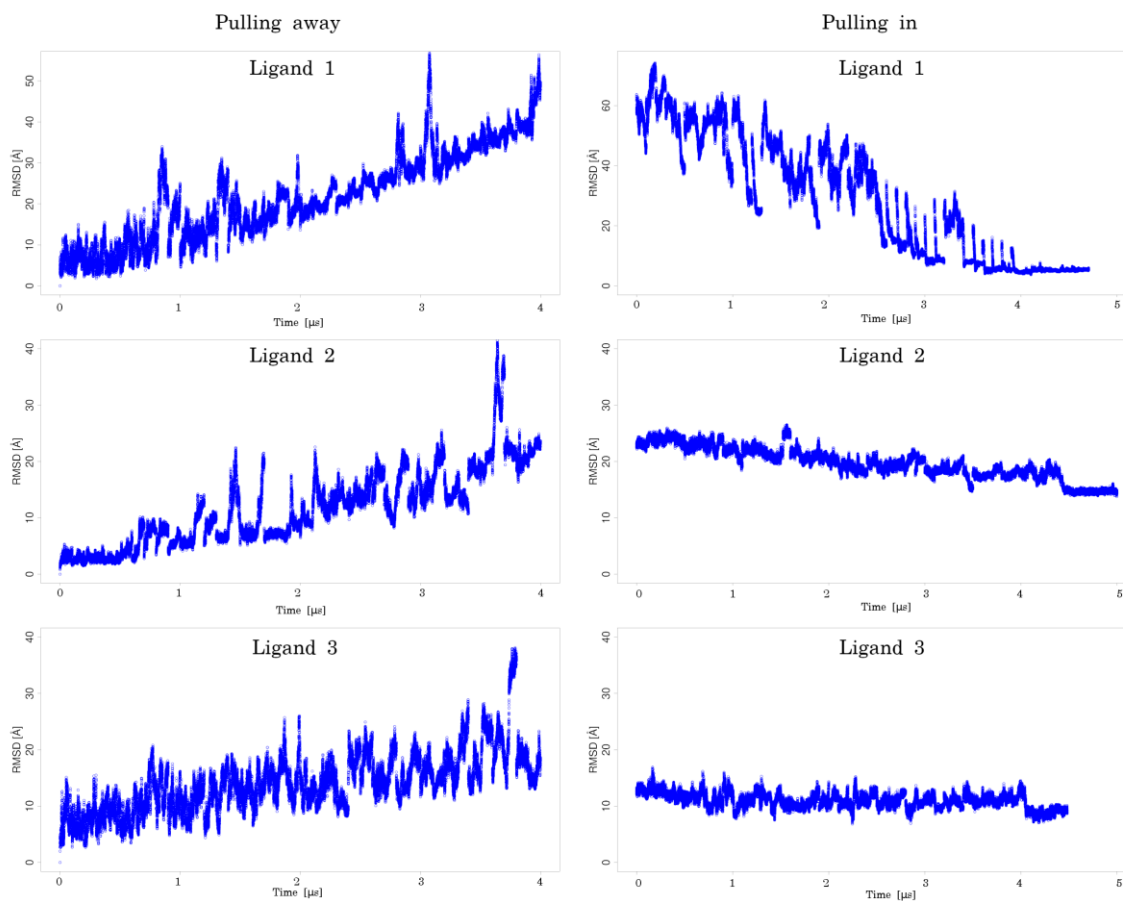

**Figure S4.** RMSD values obtained using cpptraj script from AMBER suite for 2AXM complexes with 3 different ligands: ligand is pulled away from the binding site (left panel) and is pulled in towards the binding site (right panel).

## 2AXM

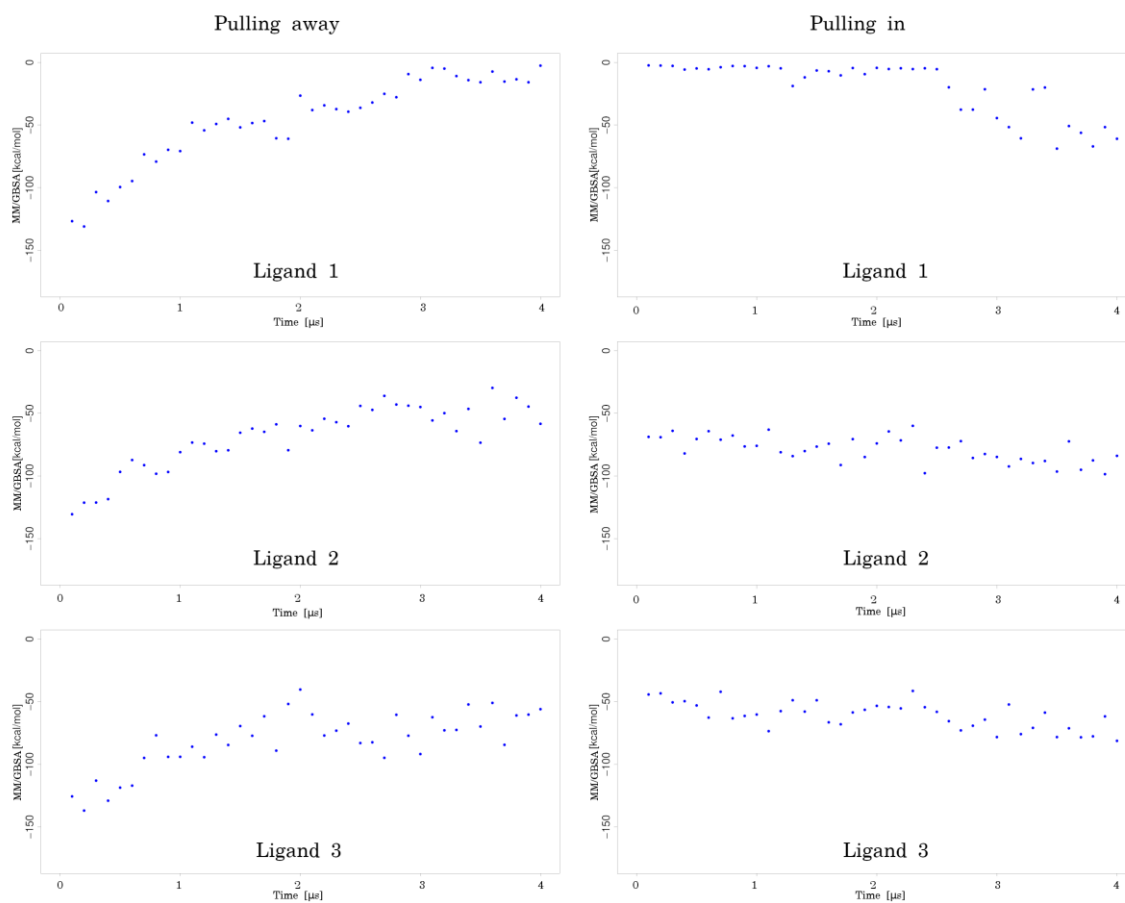

**Figure S5.** Energies obtained from MM/GBSA analysis for 2AXM complexes with 3 different ligands: ligand is pulled away from the binding site (left panel) and is pulled in towards the binding site (right panel).

## 2AXM

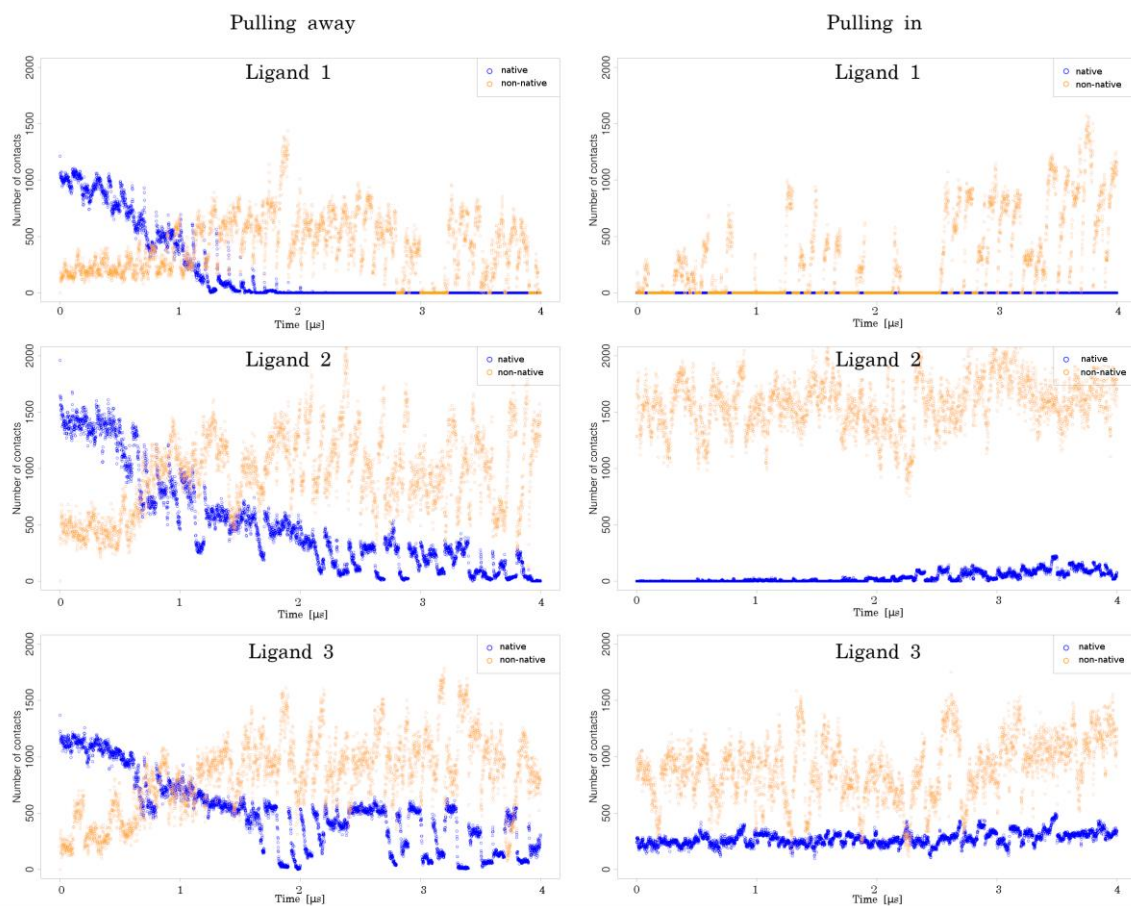

**Figure S6.** Number of native and non-native contacts obtained using cpptraj script from AMBER suite for 2AXM complexes with 3 different ligands: ligand is pulled away from the binding site (left panel) and is pulled in towards the binding site (right panel).

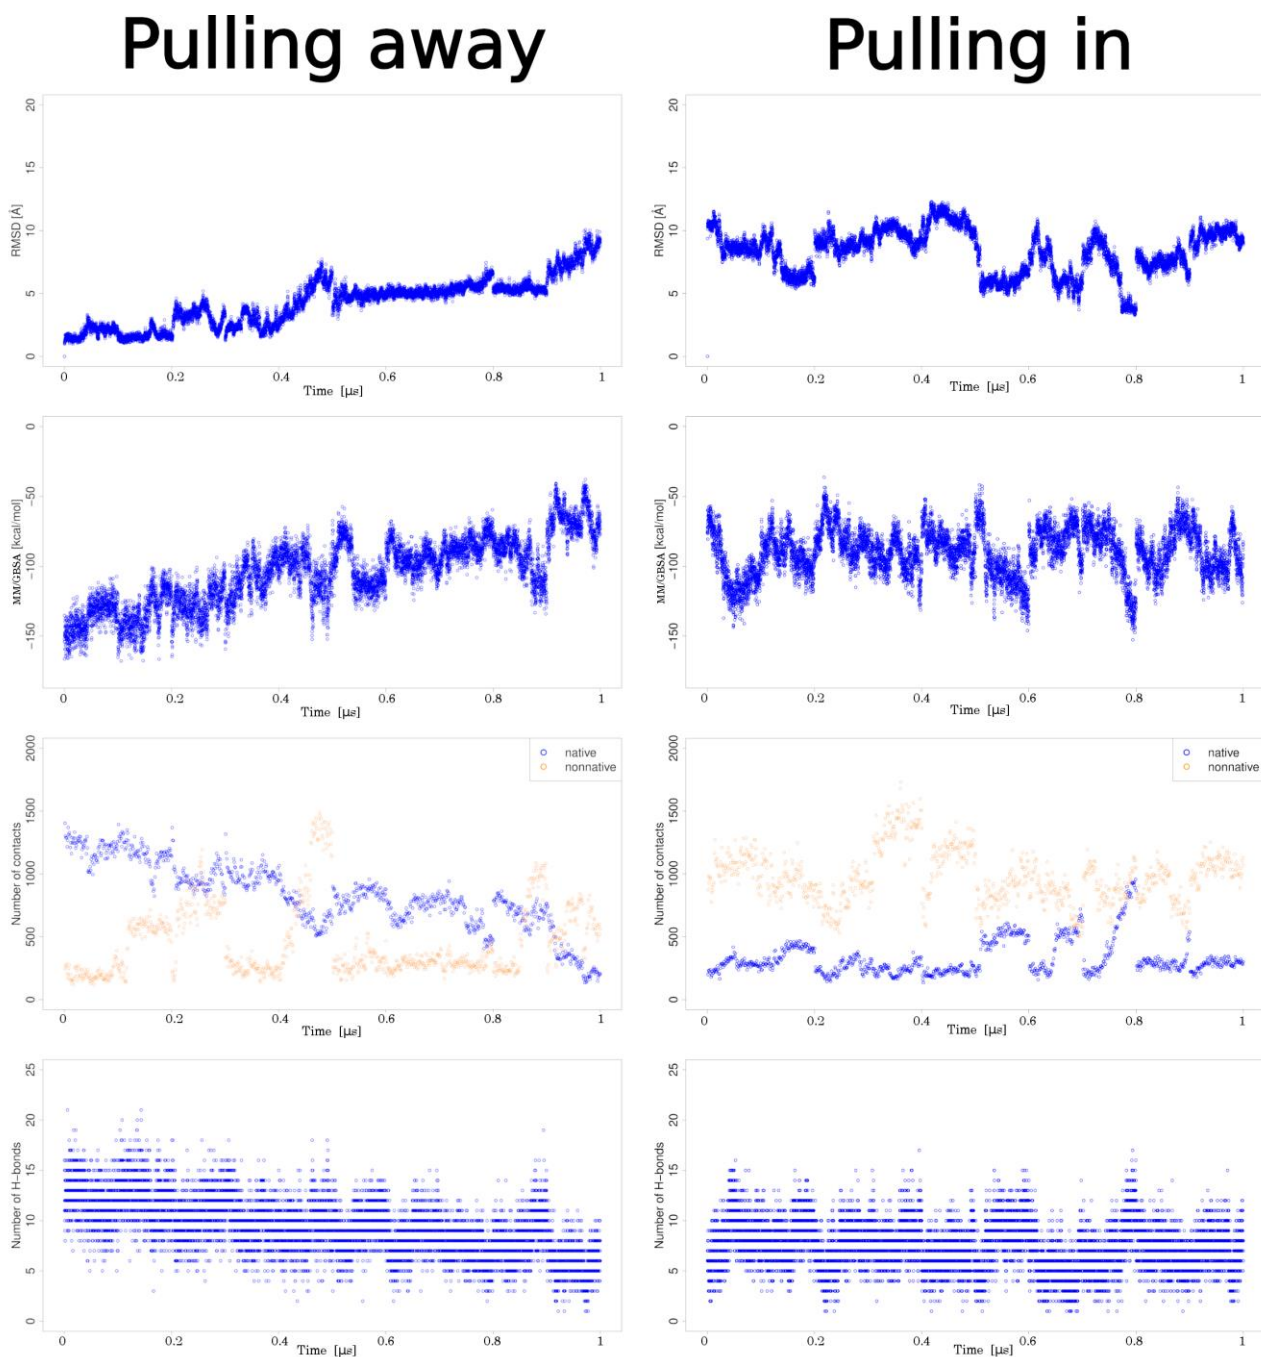

**Figure S7.** Pulling away and pulling in ligand 1 by dp2: RMSD, MM/GBSA binding energy, established contacts and h-bonds number.



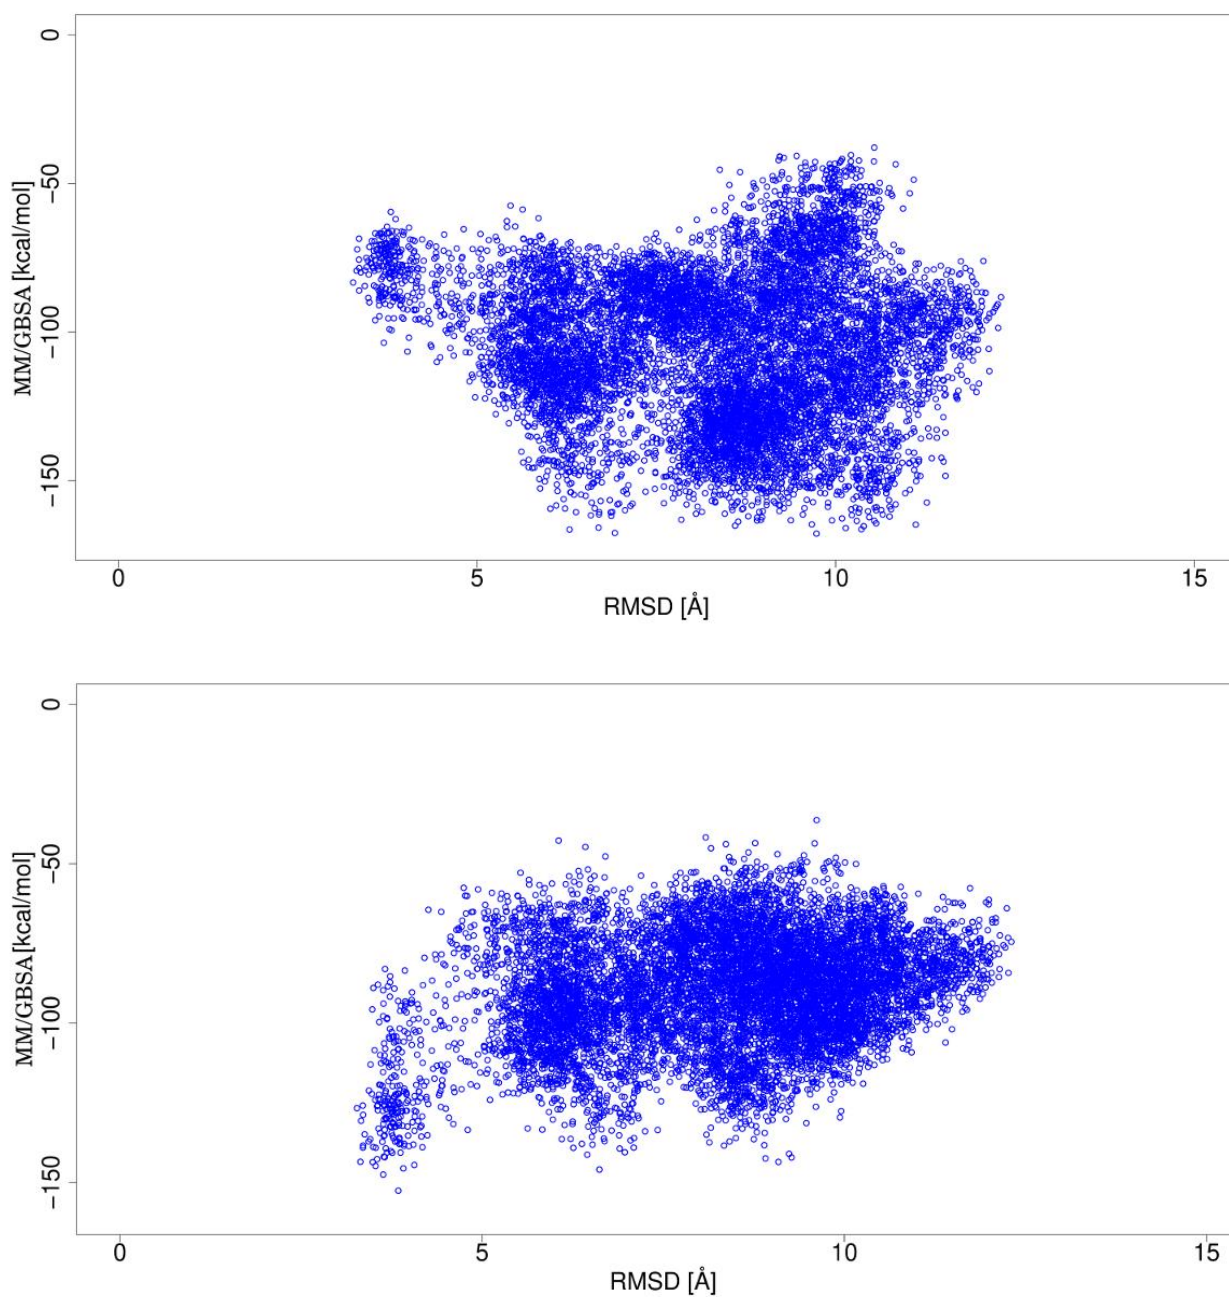

**Figure S8.** MM/GBSA energy vs. RMSD for the pulling away (upper panel) and pulling in (bottom panel) ligand 1 by dp2. The Pearson and Spearman correlation coefficients are  $-0.18$ ,  $-0.16$  and  $0.25$ ,  $0.20$ , respectively.

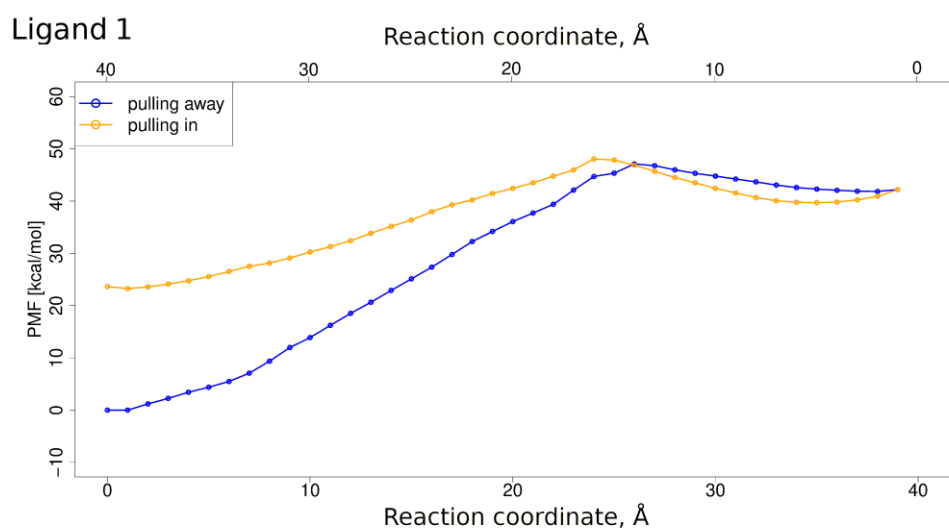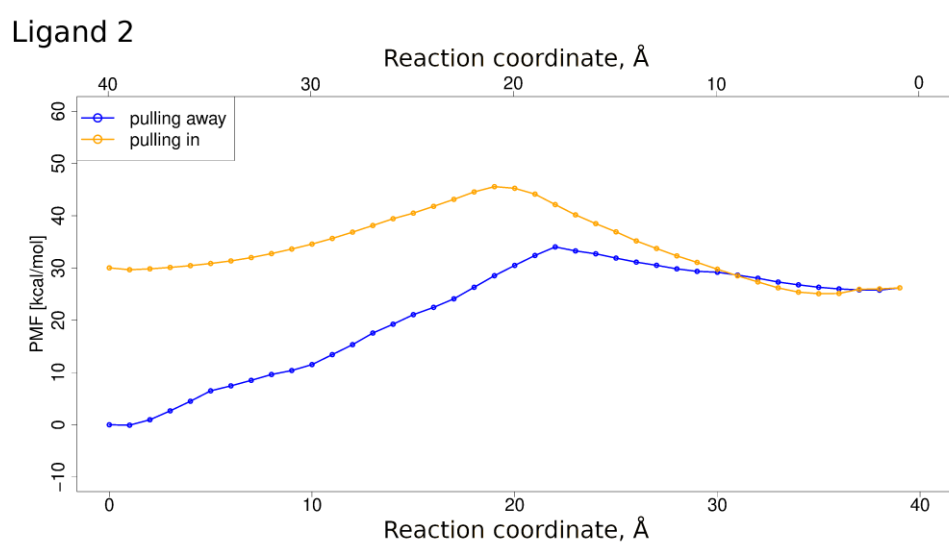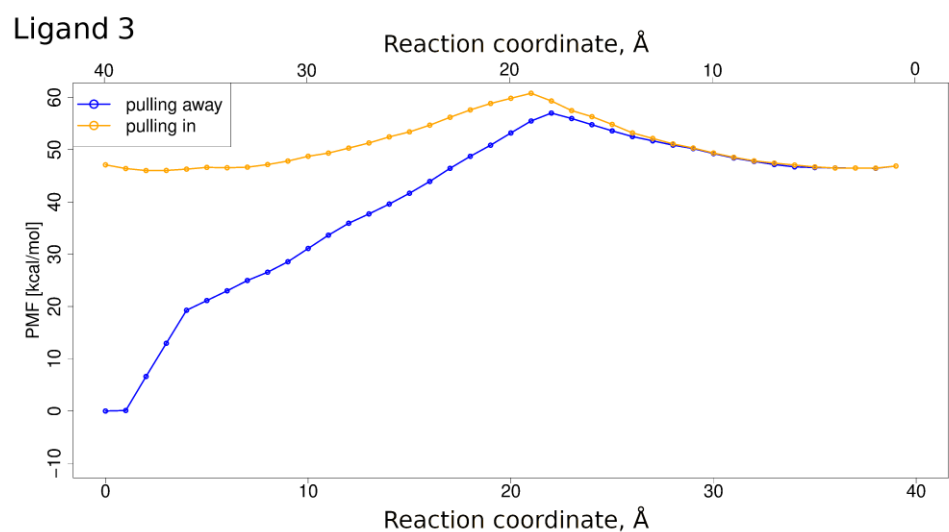

**Figure S9.** PMF of pulling away (the axis is at bottom) and pulling in (the axis is at top) along the reaction coordinate for ligands 1, 2, and 3 for 1BFC.

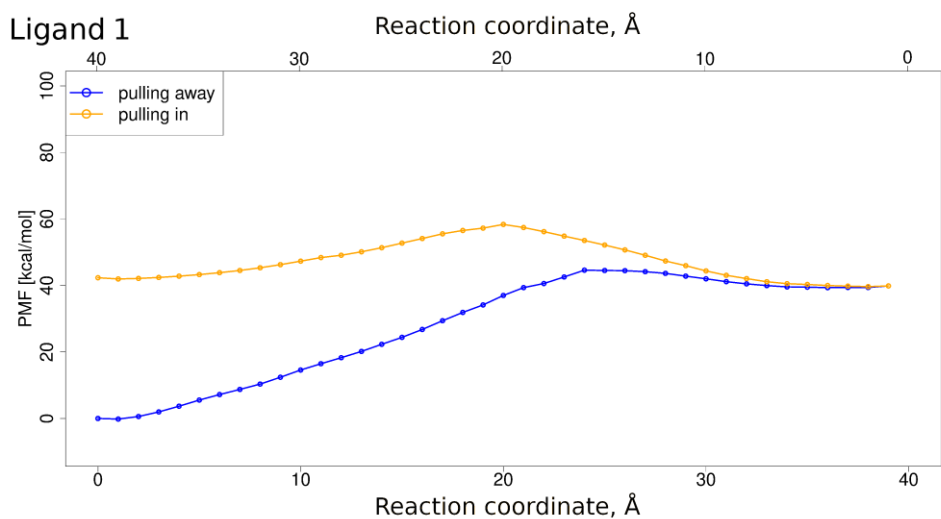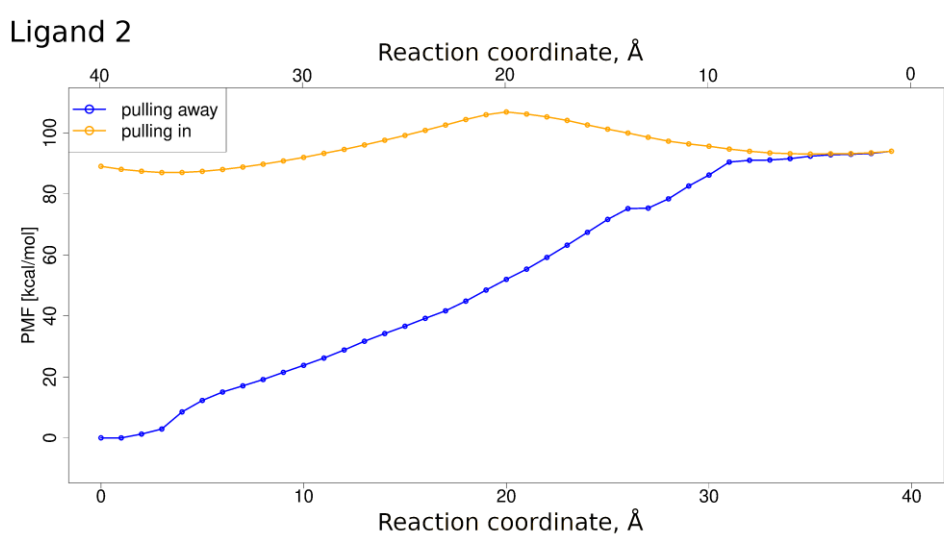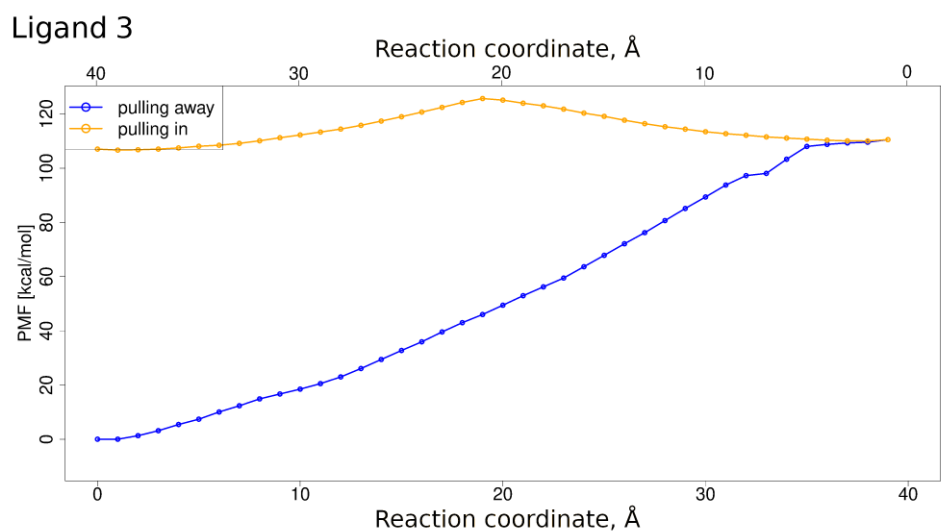

**Figure S10.** PMF of pulling away (the axis is at bottom) and pulling in (the axis is at top) along the reaction coordinate for ligands 1, 2, and 3 for 2AXM.

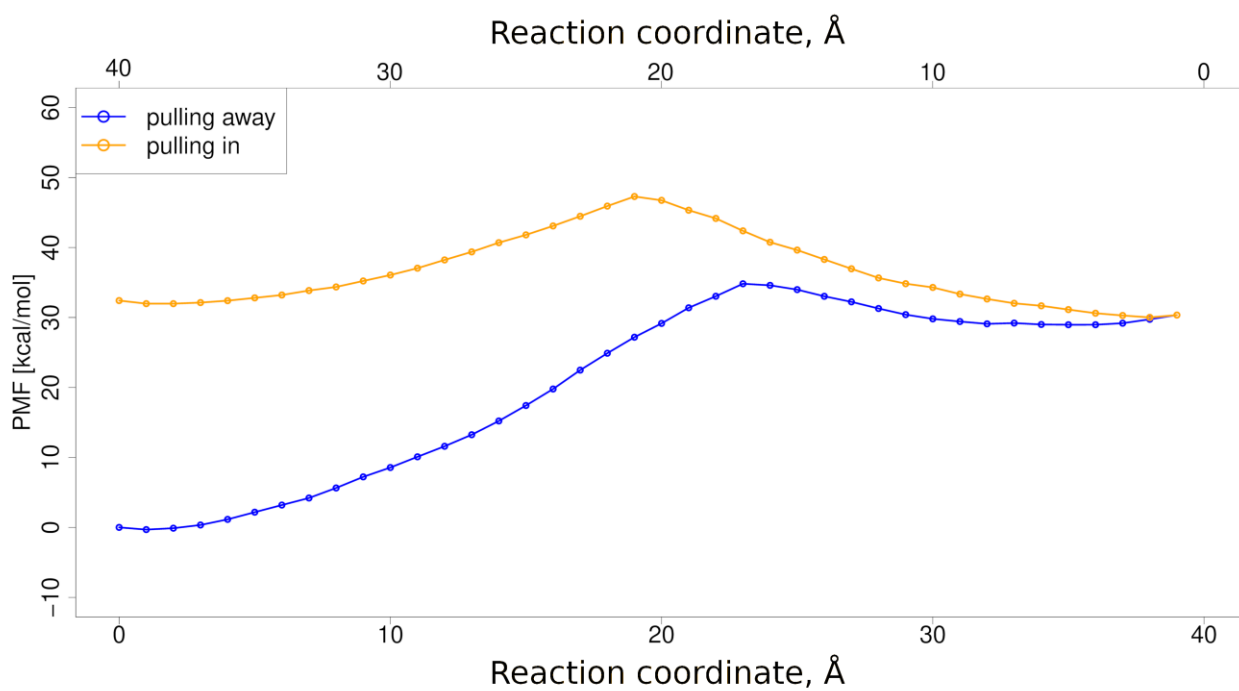

**Figure S11.** PMF of pulling away (the axis is at bottom) and pulling in (the axis is at top) along the reaction coordinate for ligand 4 for 3CE9.

**Table S1.** Ligand's RMSatd in Å showing comparison of the last frame in the pulling in process with their corresponding experimental structure.

| Protein | Ligand   | RMSatd score |
|---------|----------|--------------|
| 1BFC    | Ligand 1 | 9.3          |
|         | Ligand 2 | 6.6          |
|         | Ligand 3 | 7.2          |
| 2AXM    | Ligand 1 | 4.1          |
|         | Ligand 2 | 4.3          |
|         | Ligand 3 | 7.7          |
| 3C9E    | Ligand 4 | 4.1          |
| 4N8W    | Ligand 4 | 8.3          |

**Table S2.** Ligand's RMSatd in Å showing comparison of the last frame in the pulling in process with their corresponding docked structure.

| Protein | Ligand   | RMSatd score |
|---------|----------|--------------|
| 1BFC    | Ligand 1 | 15.8         |
|         | Ligand 2 | 3.2          |
|         | Ligand 3 | 14.5         |
| 2AXM    | Ligand 1 | 3.8          |
|         | Ligand 2 | 9.4          |
|         | Ligand 3 | 18.0         |
| 3C9E    | Ligand 4 | 10.2         |
